# Supplementary material for: The expression of Lin28a in the ovaries and the association of Lin28a and Lin28b with litter size in goats
Source: Copernicus journal article supplement (doi:10.5194/aab-68-435-2025), 2025-07-01
Supplement: Supplementary file 1 [file aab-68-435-2025-supplement.zip]

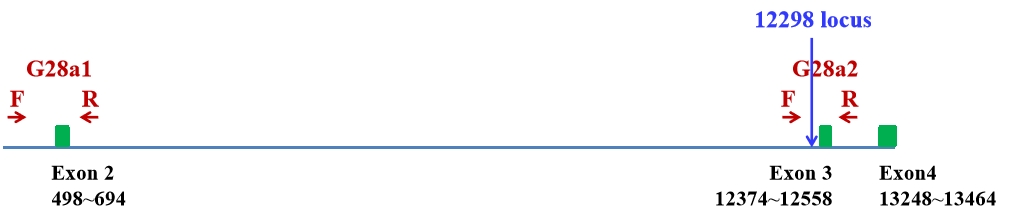


Figure S1. The primer location in the goat *Lin28a* gene (NC_030809).


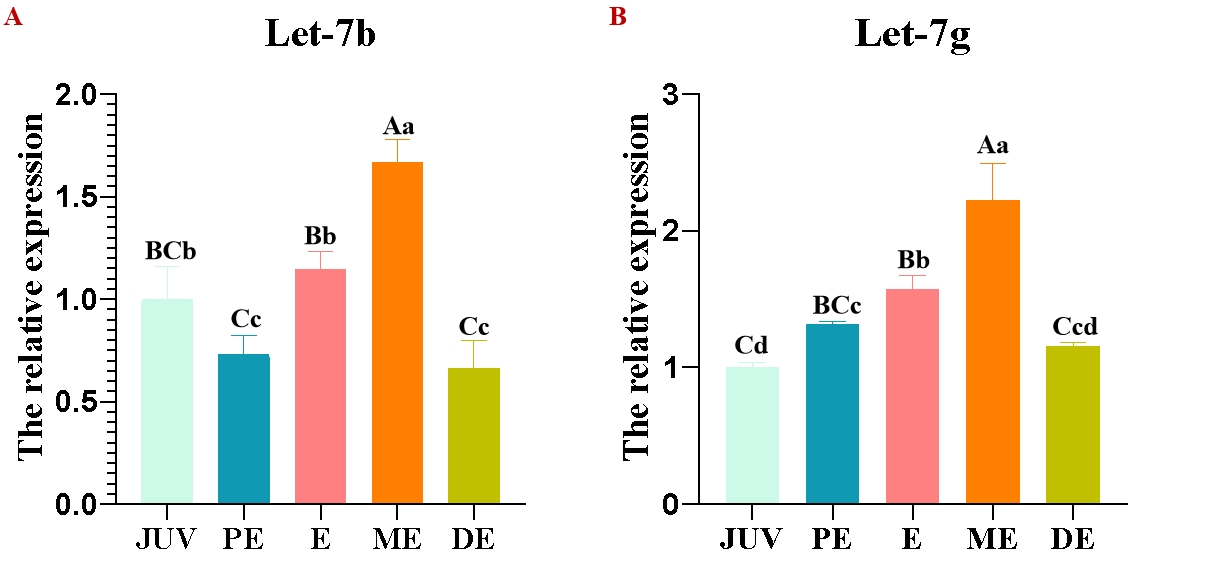


Figure S2. The expression of *let-7b* and *let-7g* in goat ovary tissue. A, *let-7b* and B, *let-7g*. The different capital and small letter means differ significantly (*P* < 0.01 and *P* < 0.05, respectively) in multiple comparisons. JUV, ovaries from one month-old goats. PE, proestrus goat ovaries. E, estrus goat ovaries. ME, metaestrus goat ovaries. And DE, diestrus goat ovaries.
