# Supplementary material for: The expression of Lin28a in the ovaries and the association of Lin28a and Lin28b with litter size in goats
Source: Copernicus journal article supplement (doi:10.5194/aab-68-435-2025), 2025-07-01
Supplement: Supplementary file 1 [file aab-68-435-2025-supplement.zip]

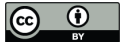

## *Supplement of*

# **The expression of *Lin28a* in the ovaries and the association of *Lin28a* and *Lin28b* with litter size in goats**

**Huili Liang et al.**

*Correspondence to:* Mingxing Chu (mxchu@263.net) and Guiling Cao (cglling@126.com)

- aab-68-435-2025-supplement-title-page.pdf
- Figure S1 and S2 —aab-2024-52.docx
- Supplementary sequences—aab-2024-52.docx

The copyright of individual parts of the supplement might differ from the article licence.
